# Supplementary material for: Three dimensional carbon nanotube/nickel hydroxide gels for advanced supercapacitors
Source: Royal Society of Chemistry journal article supplement (doi:10.1039/c5ra01847a), 2015-01-01
Supplement: c5ra01847a1.pdf [file c5ra01847a1.pdf]

Supporting information for

Three Dimensional Carbon Nanotube/Nickel Hydroxides Gels for Advanced Supercapacitors

Cheng Hanlin<sup>a</sup>, Hai M. Duong<sup>a\*</sup>

a. Department of Mechanical Engineering, National University of Singapore

9 Engineering Drive 1, EA-07-05, Singapore, 117575 SINGAPORE

\* Correspondence author: [mpedhm@nus.edu.sg](mailto:mpedhm@nus.edu.sg)

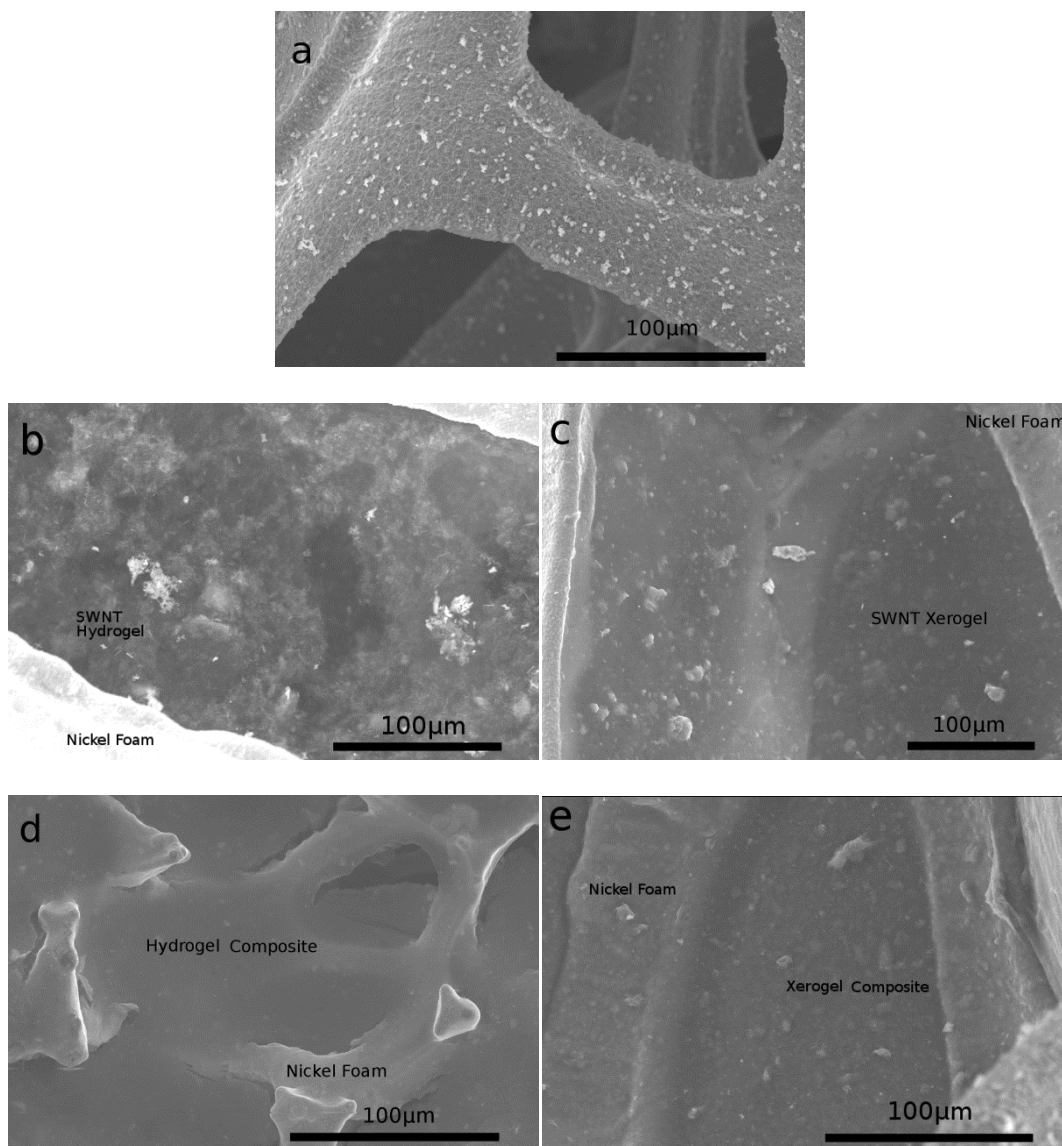

**Fig. S1** FESEM images of gel composites in smaller magnification: (a)  $\text{Ni(OH)}_2$  at nickel foam (b) CNTs hydrogel (c) CNTs xerogel (d) NiC hydrogel (NiC-hydro) composite and (e) NiC xerogel (NiC-xero) composite

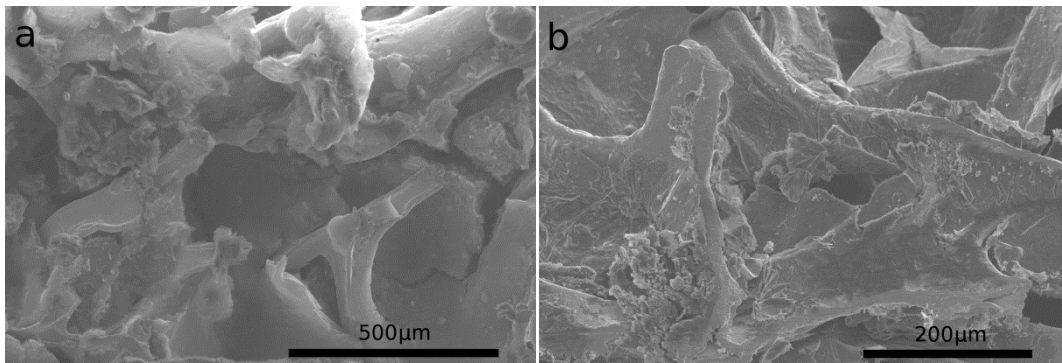

**Fig. S2** Cross sectional area image of (a) NiC-hydro and (b) NiC-xero .

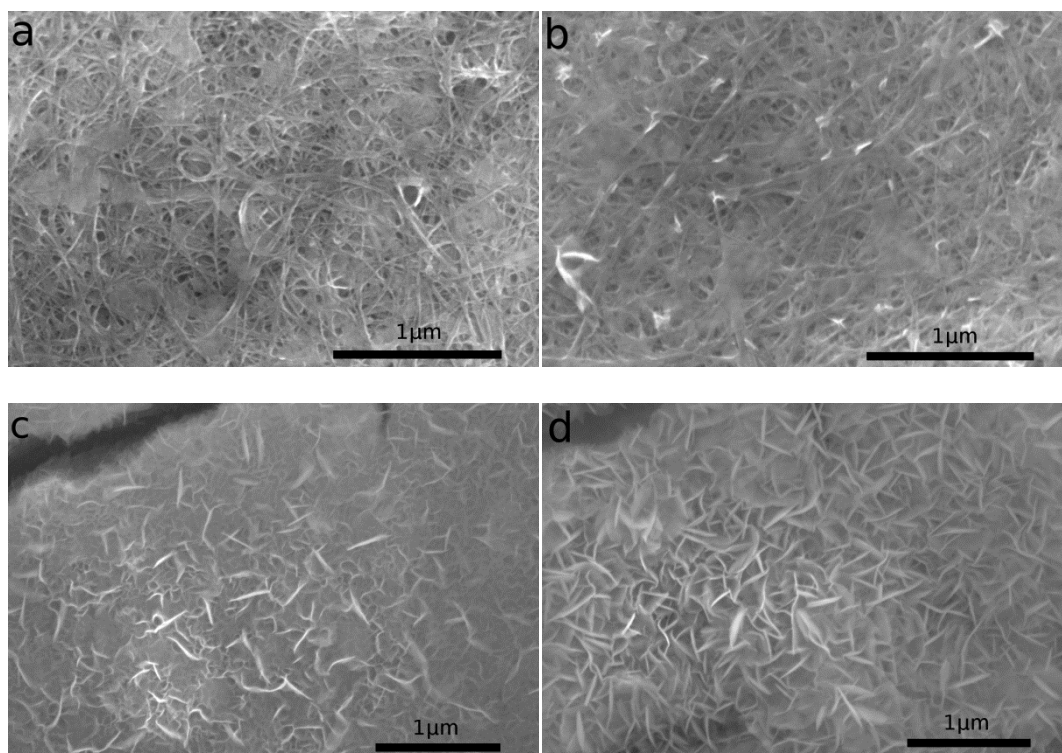

**Fig. S3** FESEM images of the  $\text{Ni}(\text{OH})_2/\text{SWNT}$  xerogel (NiC-xero) composites having  $\text{Ni}(\text{OH})_2$  deposited at difference charges: (a) 1.11C (b) 3.33C (c) 5.55C (d) 7.77C.

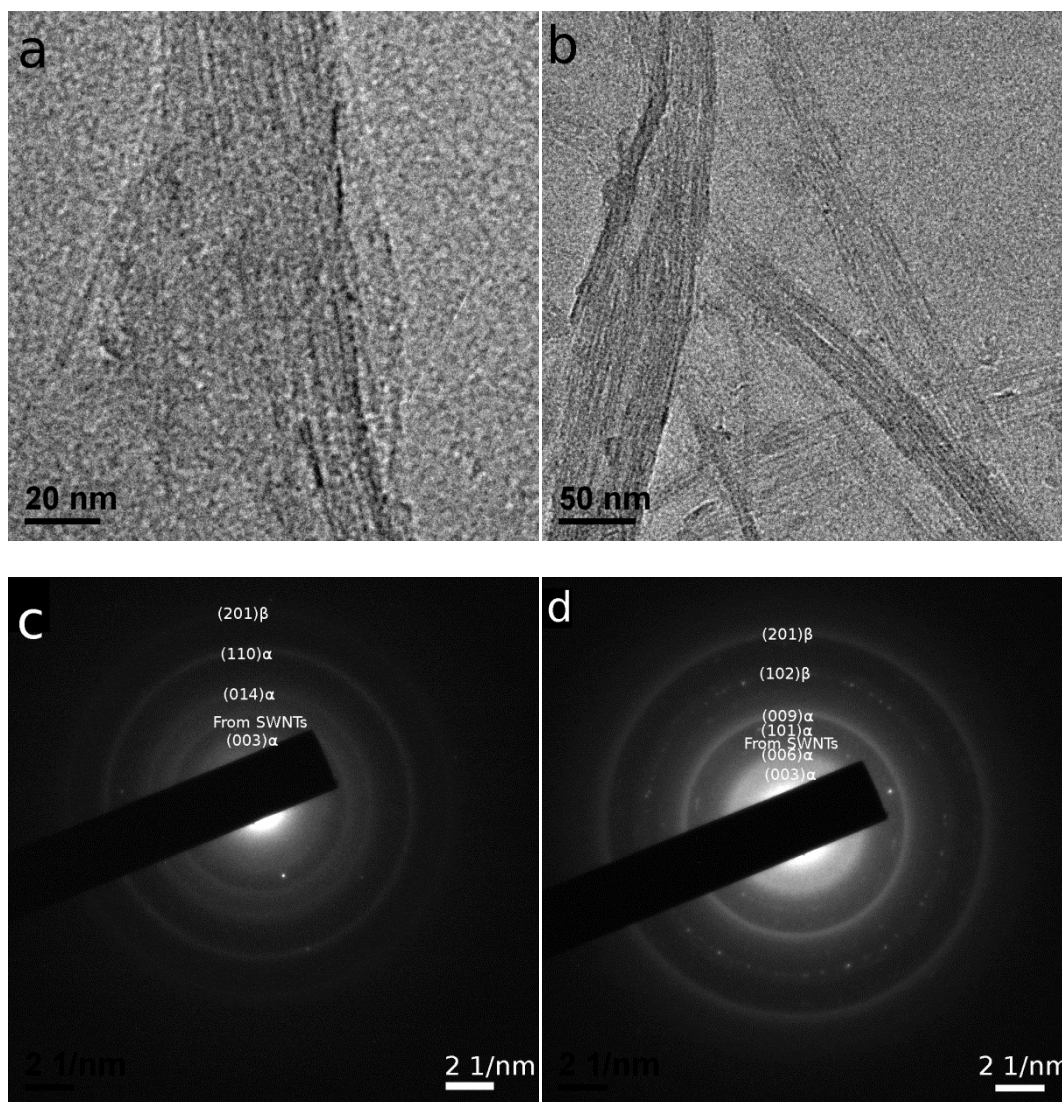

**Fig. S4** TEM images of (a) NiC-hydro (b) NiC-xero, SAED pattern of the (c) NiC-hydro and (d) NiC-xero

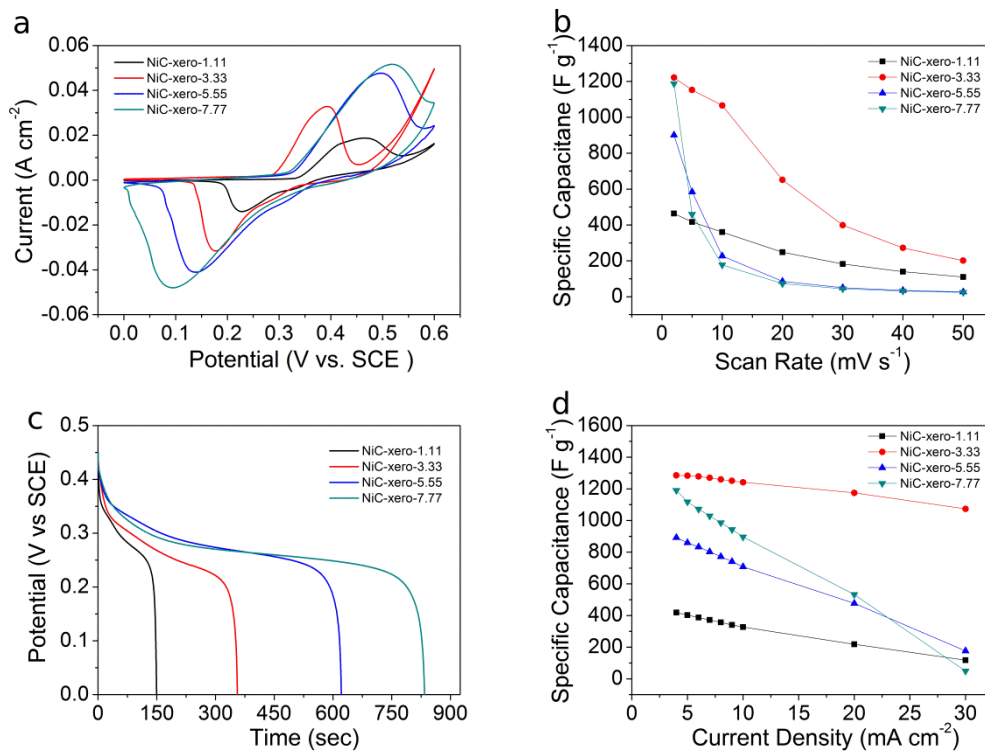

**Fig. S5** Electrochemical performance of xerogel electrodes having different  $\text{Ni(OH)}_2$  loadings: (a) CV curves of difference  $\text{Ni(OH)}_2/\text{SNWT}$  xerogel electrodes (b) specific capacitances of the  $\text{Ni(OH)}_2/\text{SNWT}$  xerogel electrodes calculated from different scan rates (c) discharge profiles of the  $\text{Ni(OH)}_2/\text{SNWT}$  xerogel electrodes and (d) specific capacitances of the  $\text{Ni(OH)}_2/\text{SNWT}$  xerogel electrodes calculated from different galvanic discharge rates.

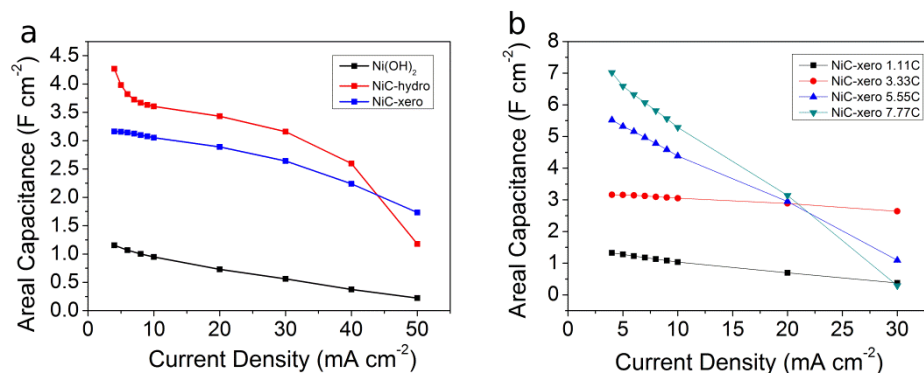

**Fig. S6** Comparison of areal capacitance of (a) different Ni(OH)<sub>2</sub>/SWNT gel composites and (b) Ni(OH)<sub>2</sub>/SWNTs xerogel composites synthesized through different accumulated during synthesis.

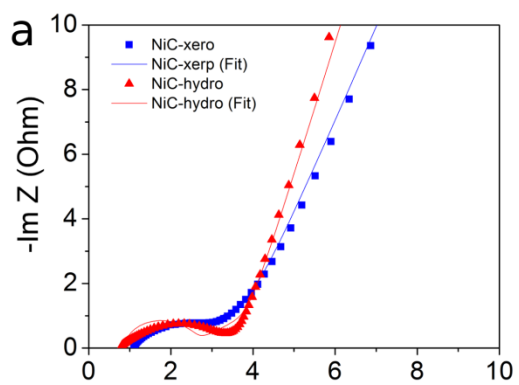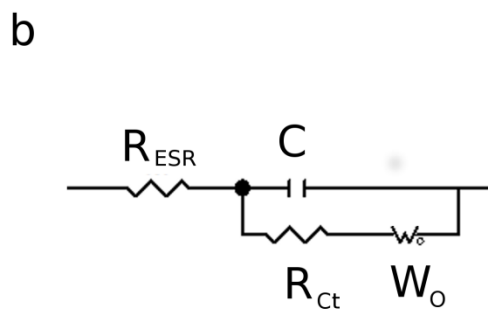

**Fig. S7** Electrochemical impedance spectroscopy: (a) fitting results of NiC-xero and NiC-hydro and (b) equivalent circuit model.
